# Supplementary material for: Formation of CoNi2S4nanofibers with 3D hierarchical pompom-like structure for high-rate electrochemical capacitors
Source: Royal Society of Chemistry journal article supplement (doi:10.1039/c9nj03200b), 2019-01-01
Supplement: c9nj03200b1.pdf [file c9nj03200b1.pdf]

## Supporting Information

### Formation of $\text{CoNi}_2\text{S}_4$ nanofibers with 3D hierarchical pompom-like structure for high-rate electrochemical capacitors

Jingjing Yuan,<sup>a,b</sup> Dachuan Yao,<sup>a</sup> Xiaoke Zheng,<sup>a</sup> Jianxing Liang,<sup>a</sup> Ling Jiang,<sup>a</sup> Jianfei Che,<sup>\*b</sup> Guangyu

He <sup>a</sup>, Haiqun Chen <sup>\*a</sup>

<sup>a</sup> Advanced Catalysis and Green Manufacturing Collaborative Innovation Center, Key Laboratory of Advanced Catalytic Materials and Technology, Changzhou University, Changzhou, Jiangsu 213164, China.

<sup>b</sup> School of Chemical Engineering, Nanjing University of Science and Technology, Nanjing, Jiangsu 210094, China.

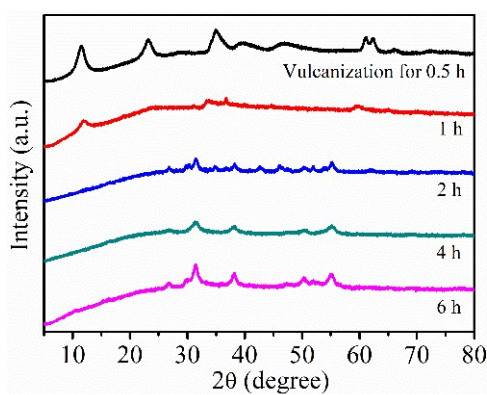

Fig. S1. XRD patterns of intermediate products obtained in the formation of pompom-like  $\text{CoNi}_2\text{S}_4$

from  $\text{Co}_3\text{Ni}_6(\text{OH})_{18}(\text{CO}_3)_{1.3}$  precursor.

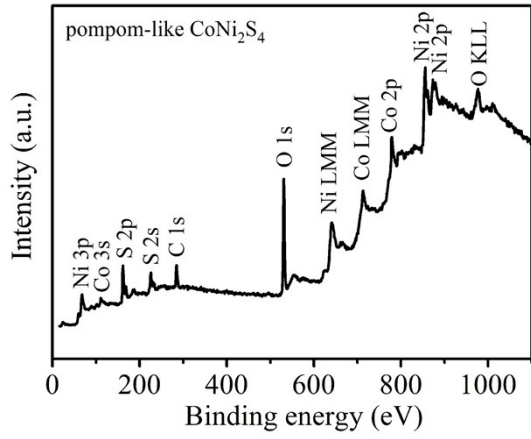

Fig. S2. XPS survey spectrum of pompom-like  $\text{CoNi}_2\text{S}_4$ .

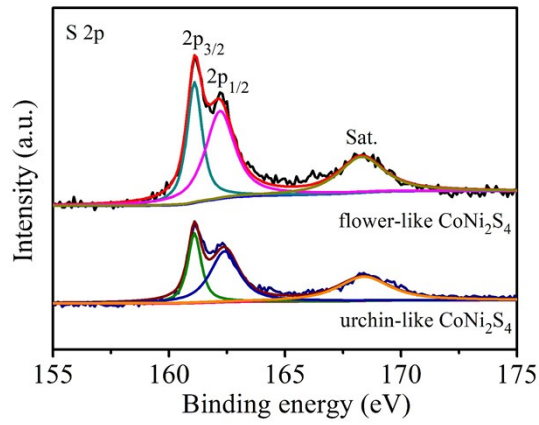

Fig. S3. Core-level XPS spectra of S 2p of flower-like and urchin-like  $\text{CoNi}_2\text{S}_4$ .

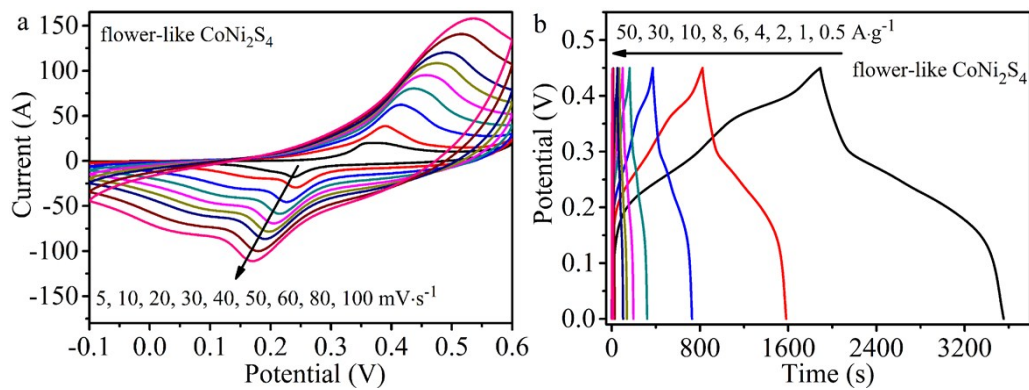

Fig. S4. CV curves at various scan rates (a) and GCD profiles at different current densities (b) of

flower-like  $\text{CoNi}_2\text{S}_4$ .

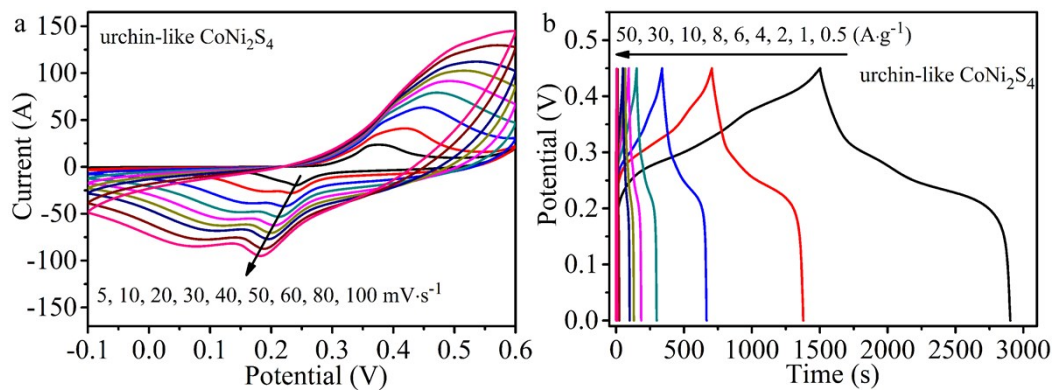

Fig. S5. CV curves at various scan rates (a) and GCD profiles at different current densities (b) of urchin-like  $\text{CoNi}_2\text{S}_4$ .

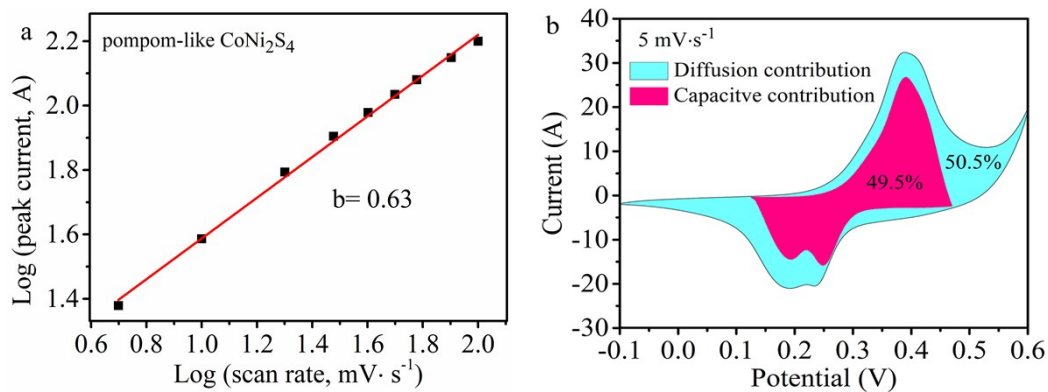

Fig. S6. Value of  $b$  determined by using the relationship between peak current and scan rate (a), contribution of diffusion-controlled process and capacitive process at  $5 \text{ mV s}^{-1}$  (b).
